# Supplementary material for: Developmental SHP2 dysfunction underlies cardiac hypertrophy in Noonan syndrome with multiple lentigines
Source: JCI journal article supplement (doi:10.1172/jci80396), 2016-06-26
Supplement: sd1 [file 1]

**Lauriol, et. al.**

**Supplemental Figures:**

*Supplemental Figure 1.*

NSML mice have no differences in tibia lengths or lung weights at 12-weeks of age.

*Supplemental Figure 2.*

Isolated individual cardiomyocytes are larger and fetal gene expression profile is upregulated in adult NSML mice.

*Supplemental Figure 3.*

NSML mice have enlarged chamber dimensions, indicative of hypertrophy.

*Supplemental Figure 4.*

NSML mice have normal placentae histology.

*Supplemental Figure 5.*

NSML mice have normal valve volumes at P1.

*Supplemental Figure 6.*

NSML mutant expression differentially affects apoptosis and proliferation in compact vs. trabecular myocardium.

*Supplemental Figure 7.*

Loss-of-function mutations in PTPN11 lead to down-regulation of endocardial Foxp1 and Notch1 expression.

*Supplemental Figure 8.*

Quantification of Foxp1 and Notch1 mRNA levels in NSML embryos.

**Supplemental Tables:**

*Supplemental Table 1.*

Distribution table of embryonic viability from heterozygote Shp2<sup>Y279C/+</sup> timed-mating crosses.

*Supplemental Table 2.*

Anatomic and functional parameters, as assessed by echocardiography, in NSML Mice at the indicated ages.

*Supplemental Table 3.*

Aortic measurements in NSML mice.

*Supplemental Table 4.*

Primer sequences

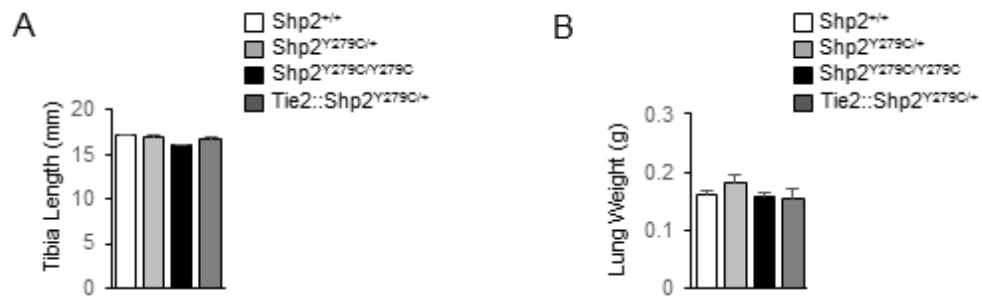

*Supplemental Figure 1. NSML mice have no differences in tibia lengths or lung weights at 12-weeks of age. A.* Tibia lengths and *B.* lung weights of NSML adult hearts. Note: N= 3-6 - mice/group. Data represent mean  $\pm$  SEM; \*\*P < 0.01, 2-tailed Student's t test.

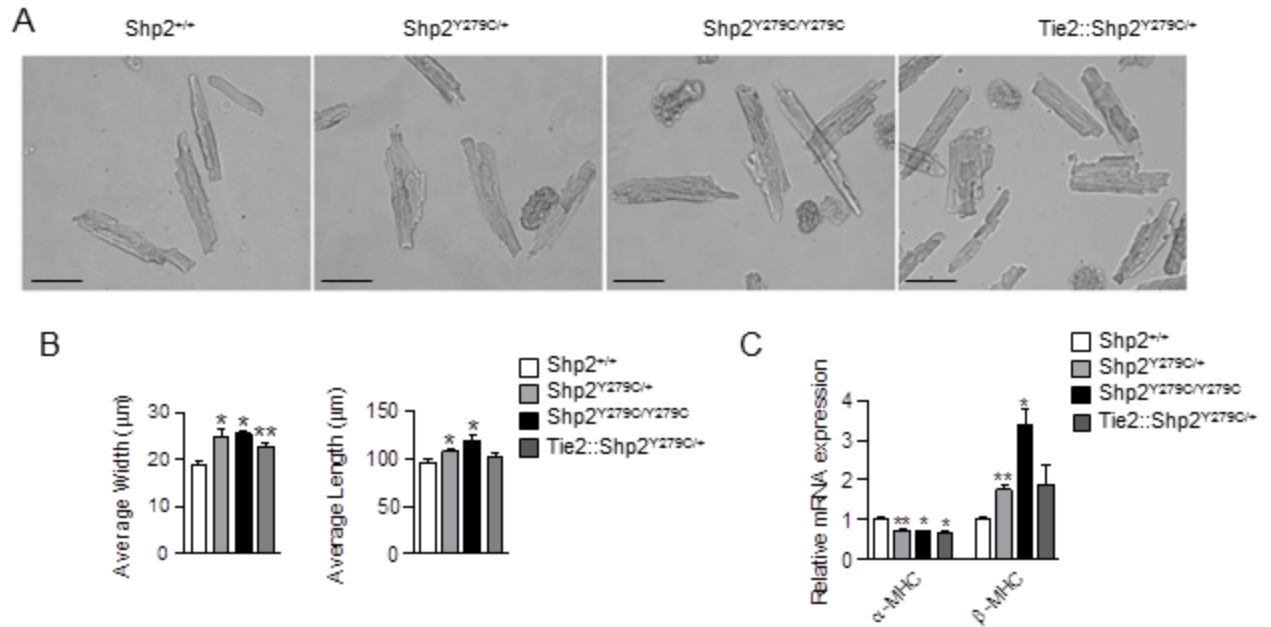

**Supplemental Figure 2. Isolated individual cardiomyocytes are larger and fetal gene expression profile is upregulated in adult NSML mice.** **A.** Representative images from cardiomyocytes isolated from 12-week-old NSML hearts. Scale bar: 50μm. **B.** Average cardiomyocyte width and length measurements for NSML hearts. N=3 mice/group, with 100–300 cardiomyocytes measured/group. Data represent mean ± SEM; \*p<0.05, 2-tailed Student's t test. **C.** Cardiac fetal gene expression of alpha- (αMHC) and beta-myosin heavy chain (βMHC), where total RNA from NSML mice (n = 3–6 mice/group) was used to perform quantitative RT-PCR (each sample in triplicate). The ratio of ΔΔCT was analyzed using GAPDH as a control. Data represent mean ± SEM; \*p<0.01, 2-tailed Student's t test.

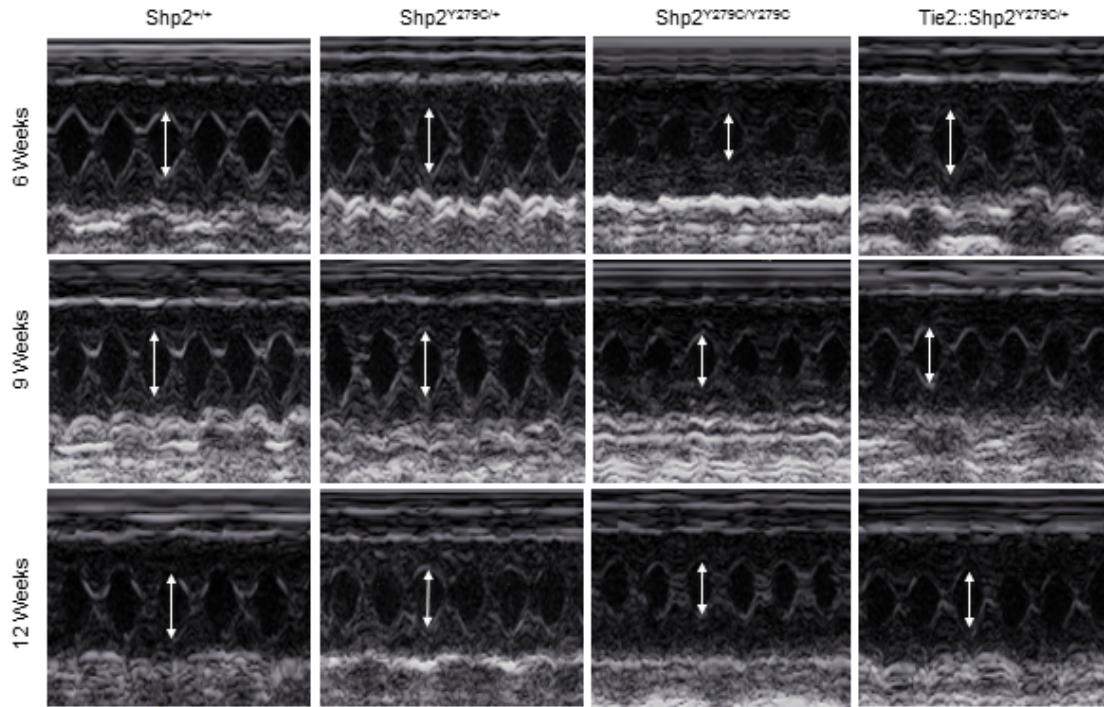

*Supplemental Figure 3. NSML mice have enlarged chamber dimensions, indicative of hypertrophy.* Representative echocardiographs of  $\text{Shp2}^{+/+}$ ,  $\text{Shp2}^{\text{Y279C}/+}$ ,  $\text{Shp2}^{\text{Y279C}/\text{Y279C}}$ , and  $\text{Tie2::Cre;Shp2}^{\text{Y279C}/+}$  mouse hearts at 6, 9, and 12 weeks of age. Two-headed arrows indicate left ventricular chamber dimension (LVDd). Note, the chamber is noticeably decreased in the  $\text{Shp2}^{\text{Y279C}/\text{Y279C}}$  hearts as early as 6 weeks, whereas the  $\text{Shp2}^{\text{Y279C}/+}$  and  $\text{Tie2::Cre;Shp2}^{\text{Y279C}/+}$  hearts show decreased chambers by 12 and 9 weeks, respectively.

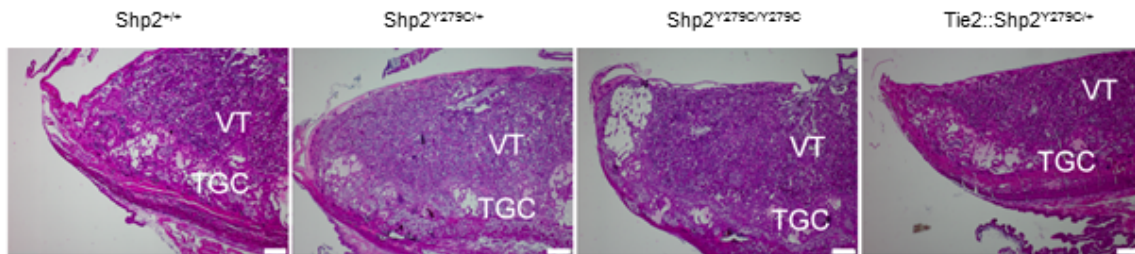

*Supplemental Figure 4. NSML mice have normal placental histology.* Representative sections of E14.5 placentae from  $Shp2^{+/+}$ ,  $Shp2^{Y279C/+}$ ,  $Shp2^{Y279C/Y279C}$ , and  $Tie2::Cre;Shp2^{Y279C/+}$  mice. Note: no abnormalities are observed. Scale bar: 20 $\mu$ m VT: villous trophoblast TGC: trophoblast giant cell.

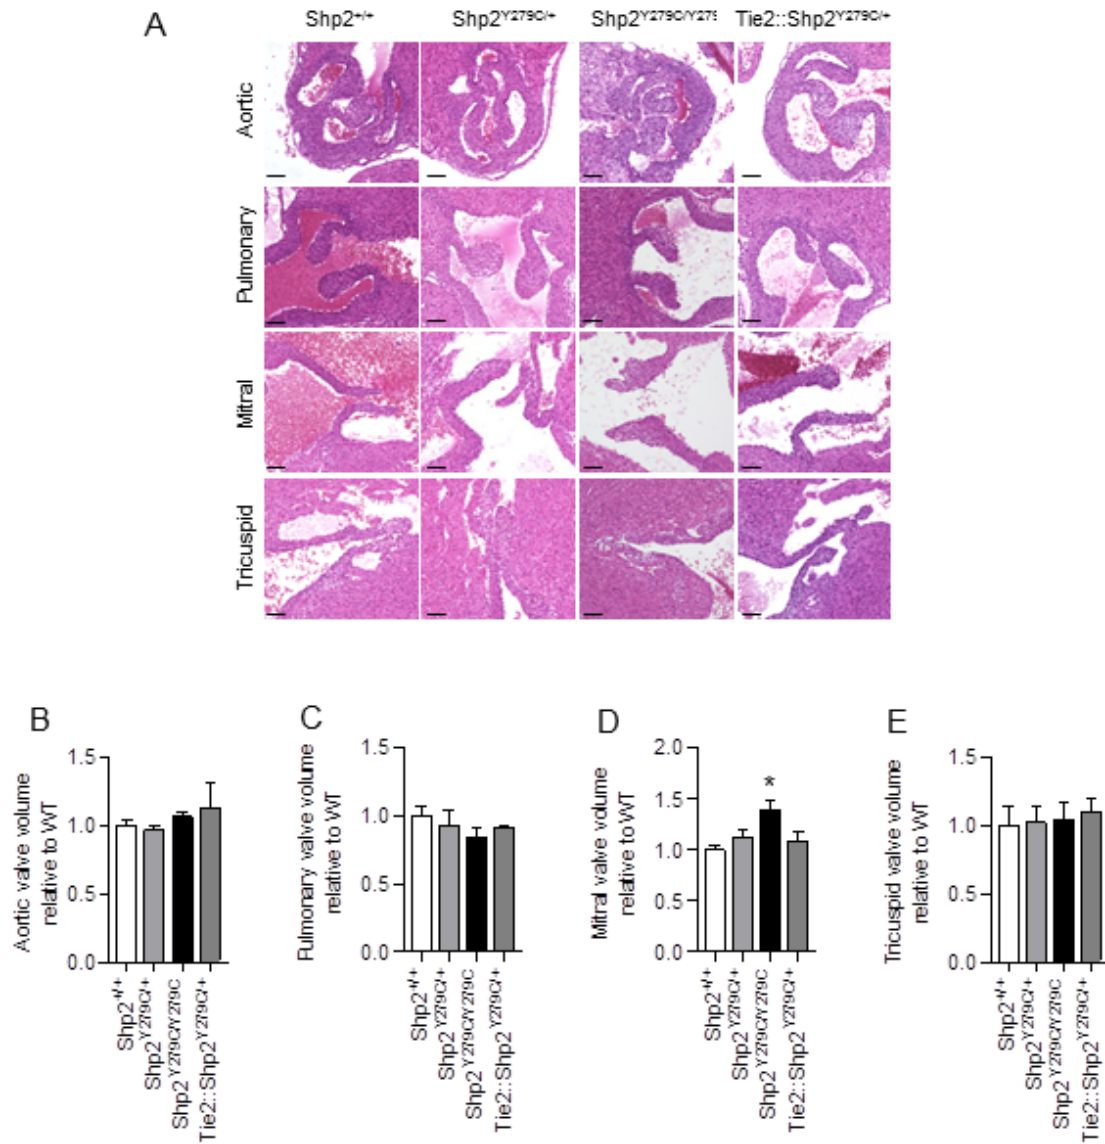

**Supplemental Figure 5. NSML mice have normal valve volumes at P1.** **A.** Representative images of NSML P1 aortic, pulmonary, mitral and tricuspid valves. Scale bar: 50μm. **B.** Quantification of serial-section reconstructions of the entire heart, representing **B.** aortic, **C.** pulmonary, **D.** mitral and **E.** tricuspid valve leaflet total volumes at P1. n=3 mice per group. Data represent mean ± SEM. \*p<0.05, where p values were derived from one-way ANOVA with Bonferroni post-test when ANOVA was significant.

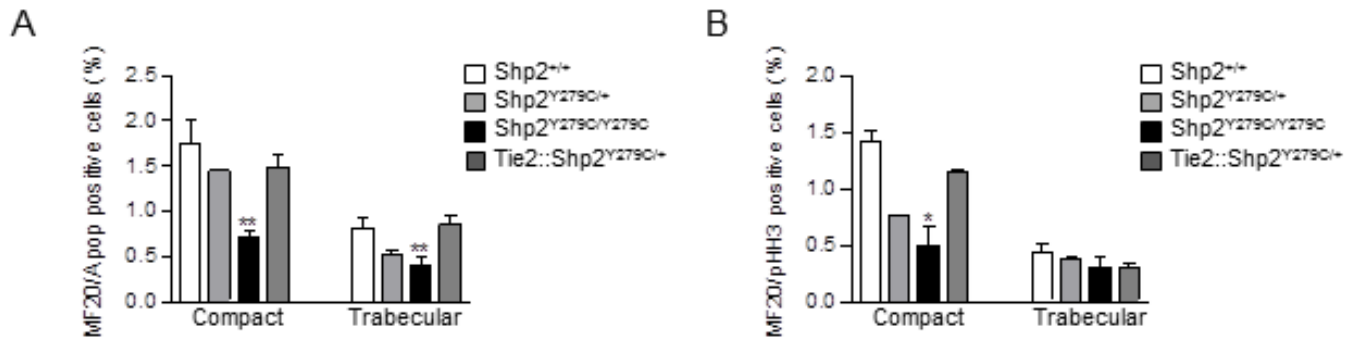

*Supplemental Figure 6. NSML mutant expression differentially affects apoptosis and proliferation in compact vs. trabecular myocardium.* Quantification of myocardial **A.** apoptosis and **B.** proliferation in the compact versus trabecular regions in E14.5 hearts. n=3 embryos per group per analysis, with counts >1000 cells/embryo/defined area. All data are expressed as mean  $\pm$  SEM. \*p < 0.05 and \*\*p<0.01. p values were derived from ANOVA with Bonferroni post-test when ANOVA was significant.



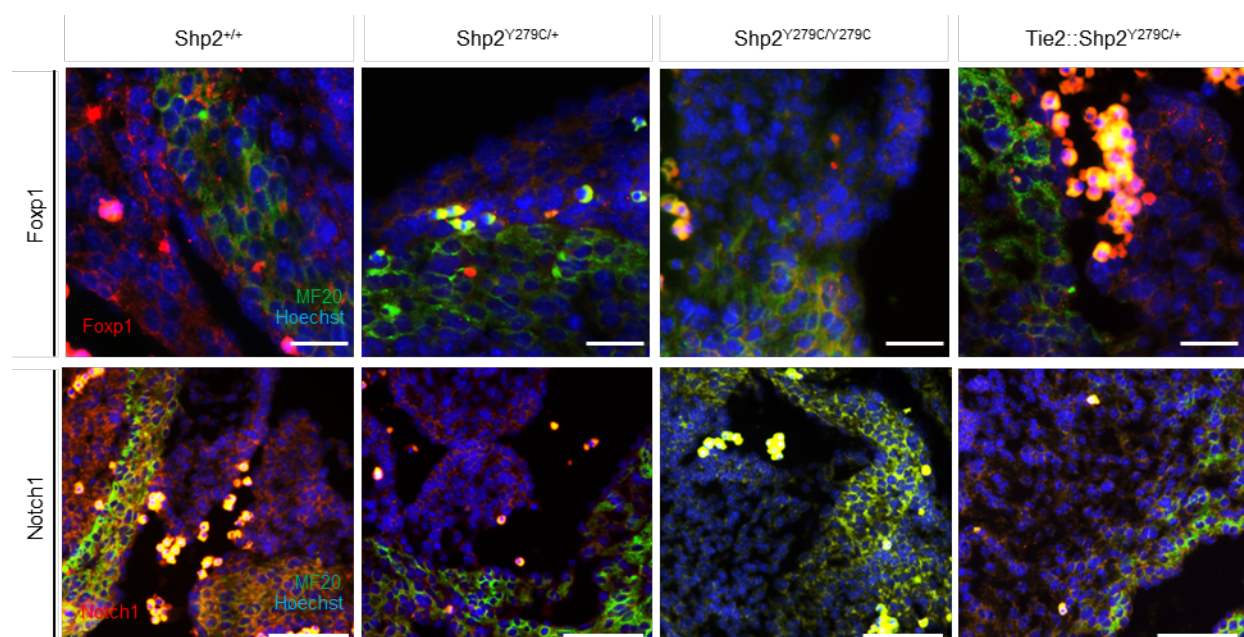

*Supplemental Figure 7. Loss-of-function mutations in PTPN11 lead to down-regulation of endocardial Foxp1 and Notch1 expression.* Immunofluorescence staining of E14.5 embryo hearts representative of endocardial Foxp1 (upper) and Notch1 (lower) expression (red) at low magnification (Scale bar: 25µm). Additional double-staining for MF20 was used to identify areas with myocardium (green) and Hoechst stain was used to mark the nuclei (upper and lower panels) and to demarcate the valves (upper panels).



A

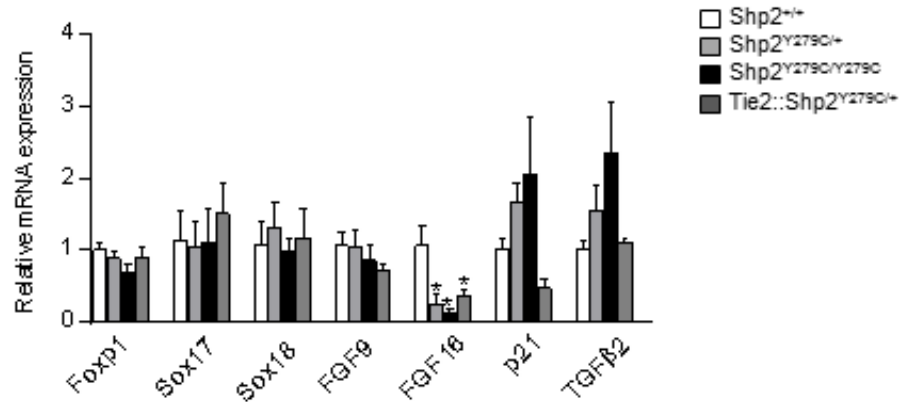

B

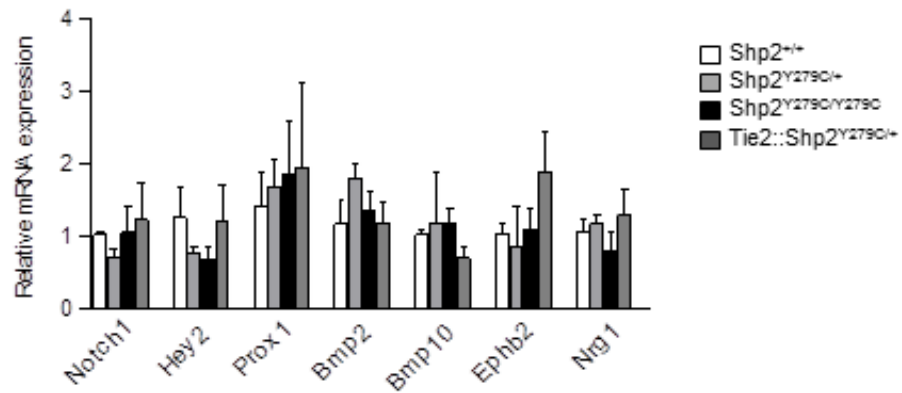

*Supplemental Figure 8. Quantification of Foxp1 and Notch1 mRNA levels in NSML embryos.* mRNA expression in embryo hearts at E10.5 quantified by qPCR of **A.** Foxp1 and **B.** Notch1 signaling pathways. N=3-6 embryos per group. Data represent mean  $\pm$  SEM; \* $p < 0.05$ . p values were derived from one-way ANOVA with Bonferroni post-test when ANOVA was significant.

| Viability of embryos from NSML heterozygous matings |                                                        |                              |                         |                             |
|-----------------------------------------------------|--------------------------------------------------------|------------------------------|-------------------------|-----------------------------|
| Age                                                 | Number of litters analyzed<br>(Number of embryos/pups) | Genotype of live embryos (%) |                         |                             |
|                                                     |                                                        | Shp2 <sup>+/+</sup>          | Shp2 <sup>Y279C/+</sup> | Shp2 <sup>Y279C/Y279C</sup> |
| E10.5                                               | 5 (42)                                                 | 26                           | 54                      | 20                          |
| E14.5                                               | 20 (153)                                               | 29                           | 52                      | 19                          |
| E15.5                                               | 3 (19)                                                 | 21                           | 63                      | 11 <sup>*</sup>             |
| Birth                                               | 37 (185)                                               | 28                           | 65                      | 7 <sup>*</sup>              |

*Supplemental Table 1. Distribution table of embryonic viability from heterozygote Shp2<sup>Y279C/+</sup> timed-mating crosses.* N=3-6 embryos per group. Data represent mean  $\pm$  SEM; \*p<0.05. p values were derived from one-way ANOVA with Bonferroni post-test when ANOVA was significant.

| Anatomic and functional parameters, as assessed by echocardiography, in NSML Mice at the indicated ages |              |                     |                         |                             |                               |
|---------------------------------------------------------------------------------------------------------|--------------|---------------------|-------------------------|-----------------------------|-------------------------------|
|                                                                                                         | Parameters   | Shp2 <sup>+/+</sup> | Shp2 <sup>Y279C/+</sup> | Shp2 <sup>Y279C/Y279C</sup> | Tie2::Shp2 <sup>Y279C/+</sup> |
| 6 Weeks                                                                                                 | HR (bpm)     | 709.90±9.52         | 740.43±16.38            | 611.41±5.01                 | 669.83±16.62                  |
|                                                                                                         | LVPW-th (mm) | 1.07±0.07           | 1.06±0.05               | 1.16±0.04                   | 1.06±0.07                     |
|                                                                                                         | LVID-d (mm)  | 2.20±0.08           | 2.40±0.13               | 1.74±0.15**                 | 2.09±0.17                     |
|                                                                                                         | FS (%)       | 59.70±1.30          | 61.12±1.48              | 58.53±5.50                  | 59.1±3.86                     |
|                                                                                                         | EF (%)       | 93.03±0.71          | 93.72±0.67              | 92.22±3.00                  | 92.49±1.86                    |
| 9 Weeks                                                                                                 | HR (bpm)     | 727.70±6.69         | 747.10±18.92            | 699.76±0.94                 | 709.09±22.22                  |
|                                                                                                         | LVPW-th (mm) | 1.08±0.09           | 1.27±0.13               | 1.75±0.09*                  | 1.44±0.02*                    |
|                                                                                                         | LVID-d (mm)  | 2.22±0.12           | 2.09±0.12               | 1.64±0.05*                  | 1.90±0.03                     |
|                                                                                                         | FS (%)       | 64.5±1.75           | 59.43±1.76              | 54.86±4.05                  | 51.12±1.60                    |
|                                                                                                         | EF (%)       | 95.15±0.72          | 92.87±0.94              | 87.8±1.17                   | 87.80±1.17                    |
| 12 Weeks                                                                                                | BM (g)       | 25.48±0.79          | 26.6±0.80               | 15.21±5.09                  | 22.38±1.36                    |
|                                                                                                         | HR (bpm)     | 734.35±8.42         | 754.69±16.81            | 622.72±3.38                 | 729.31±15.02                  |
|                                                                                                         | LVPW-th (mm) | 1.09±0.09           | 1.41±0.04*              | 1.71±0.13**                 | 1.65±0.01*                    |
|                                                                                                         | LVID-d (mm)  | 2.24±0.11           | 2.11±0.02**             | 1.93±0.08*                  | 2.10±0.06**                   |
|                                                                                                         | FS (%)       | 59.63±1.94          | 52.82±2.83              | 52.10±3.06                  | 58.22±0.41                    |
|                                                                                                         | EF (%)       | 91.97±1.02          | 88.80±1.89              | 87.16±3.41                  | 92.36±0.41                    |

**Supplemental Table 2. Anatomic and functional parameters, as assessed by echocardiography, in NSML Mice at the indicated ages.** Note the increased posterior wall thickness and smaller left ventricular chamber dimension in NSML hearts. Note that the fractional shortening calculation includes the papillary muscle. Data represent mean ± SEM; p<0.05, 2-tailed Student's t test. HR, heart rate; LVPWth, left ventricular posterior wall thickness; LVIDd, left ventricular chamber dimension in diastole; FS%, fractional shortening; EF, ejection fraction.

| Aortic Measurements in NSML mice |                      |                      |                 |
|----------------------------------|----------------------|----------------------|-----------------|
| Genotype                         | Aortic Insufficiency | Aortic Regurgitation | Aortic Dilation |
| Shp2 <sup>+/+</sup>              | 60%                  | 0%                   | None            |
| Shp2 <sup>Y279C/+</sup>          | 100%                 | 20%                  | None            |
| Shp2 <sup>Y279C/Y279C</sup>      | 100%                 | 0%                   | None            |
| Tie2::Shp2 <sup>Y279C/+</sup>    | 66.70%               | 0%                   | None            |

*Supplemental Table 3. Aortic measurements in NSML mice.* N=3-5 mice per group. Note: no significant differences in any NSML mice were noted.

| Primer names    | Sequence 5'-3'            |
|-----------------|---------------------------|
| $\alpha$ MHC-F  | CGCATCAAGGAGCTCACC        |
| $\alpha$ MHC-R  | CCTGCAGCCGCATTAAGT        |
| $\beta$ MHC-F   | GAGCAAGGCCGAGGAGACGCAGCGT |
| $\beta$ MHC-R   | GAGCCTTCTCGTCCAGCTGCCGG   |
| Foxp1-F         | ACAAATGCAGCAGATCCTCC      |
| Foxp1-R         | CTTGAAGCTGCTGTTGAAGC      |
| Sox17-F         | GCTAGGCAAGTCTTGAAGG       |
| Sox17-R         | CTTGTAGTTGGGTGGTCCT       |
| Sox18-F         | CACAACGCAGTACTGAGCAAG     |
| Sox18-R         | GGCCGGTACTTGTAGTTGGG      |
| Fgf9-F          | CTTCCGGTGTCCACATGTTT      |
| Fgf9-R          | ACGAGAAGGGGGAGCTGTAT      |
| Fgf16-F         | GAGACAGTATTATGTGGCCCTGAA  |
| Fgf16-R         | CTACTGGCCTTGGTAAAAAGTGAGT |
| P21-F           | CCTGGTGATGTCCGACCTG       |
| P21-R           | CCATGAGCGCATCGCAATC       |
| TGF $\beta$ 2-F | GAAGACCCACATCTCCTGC       |
| TGF $\beta$ 2-R | ATTTCATCCAAGATCCCTC       |
| Notch1-F        | CTGAGGCAAGGATTGGAGTC      |
| Notch1-R        | GAATGGAGGTAGGTGCGAAG      |
| Hey2-F          | TTCTGTCTCTTCGGCCACT       |
| Hey2-R          | TTGTCCCAGTGCTTGTCTG       |
| Prox1-F         | TTGACTCGGGACACAACAAG      |
| Prox1-R         | TGATGAGCTGCGAGGTAATG      |
| Bmp2-F          | TGCGCAGCTTCCATCACGAA      |
| Bmp2-R          | CACTCATCTCTGGAAGTTCCT     |
| Bmp10-F         | ACATCATCCGGAGCTTCAAGAACG  |
| Bmp10-R         | AACCGCAGTTCAGCCATGACG     |
| Ephb2-F         | CTGTGCCAGACCAGACCAAGA     |
| Ephb2-R         | CAGCAGAACTTGCATCTTGTC     |
| Nrg1-F          | AACAGCAGGCACAGCAGCCC      |
| Nrg1-R          | AGGGGAGCTTGGCGTGTGGA      |
| Gapdh-F         | GTACATGTTCCAGTATGATTCTACC |
| Gapdh-R         | CAGTGGACTCCACAACATACTCA   |
| Tbp-F           | TTCTGGGAAAATGGTGTGC       |
| Tbp-R           | CCCACCATGTTCTGGATCTT      |
| RPL13-F         | CCTGCTGCTCTCAAGGTTGT      |
| RPL-13-R        | GGTACTTCCACCCGACCTC       |

*Supplemental Table 4. Primer sequences.* All qPCR experiments were performed according to the manufacturer instructions with an annealing temperature of 60°C. Melting curves were used to assess specificity.
